# Supplementary material
Source: Springer Nature journal article supplement (https://www.springermedizin.de/resource/supplementary/12889_2010_2763_MOESM7_ESM.pdf/9488498)

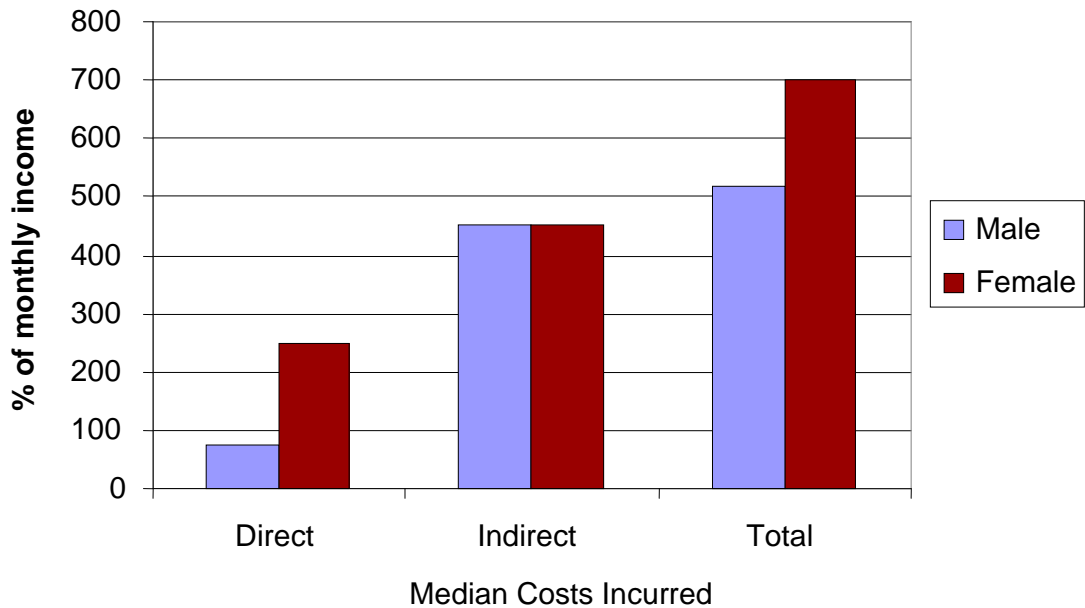

Supplement: MOESM7 [file 9488498]
